# Supplementary material for: Proviral ALV-LTR Sequence Is Essential for Continued Proliferation of the ALV-Transformed B Cell Line
Source: MDPI journal article supplement (doi:10.3390/ijms231911263), 2022-09-24
Supplement: s1 [file s1]

**Supplementary Figure S1.** Myc expression and deletion of ALV-LTR and c-myc by CRISPR/Cas9 editing in HP45 cells. A) c-myc gene expression was measured in primary B-cells, derived from chicken bursa and ALV transformed B-cell line HP45. Total RNA was extracted followed by cDNA synthesis and qPCR reaction using Myc primers and SYBR green reagent. The data was plotted as  $2^{-\Delta\Delta CT}$  where transcript levels were normalized against GAPDH and primary B-cell as control. B) PCR amplification of the edited region, using ALV-LTR or c-myc specific primers located at the flanking region of the gRNA targeting sites using genomic DNA isolated from ALV-LTR-gRNAs, c-myc-gRNAs and SgA-NT transfected Cas9 expressing HP45 cells harvested at 6, 12, 24, 48 and 72 hrs post transfection as templates. The samples were run in a 2% agarose gel. C) Sequencing chromatograms of PCR products of LTR deleted (HP45- $\Delta$ LTR) and SgA-NT control bands (HP45-SgA). The junction sequence after cleavage and re-joining in HP45- $\Delta$ LTR and the corresponding sequence in the SgA-NT transfected HP45 are outlined in red. The sequence present between the outlined sequences in the SgA-NT transfected HP45 indicated the deleted region by CRISPR/Cas9. D) Sequencing chromatograms of PCR products of c-myc deleted (HP45- $\Delta$ Myc) and SgA-NT control bands (HP45-SgA). The junction sequence after cleavage and re-joining in HP45- $\Delta$ Myc and the corresponding sequence in the SgA-NT transfected HP45 are outlined in red. The sequence present between the outlined sequences in the SgA-NT transfected HP45 indicated the deleted region by CRISPR/Cas9.

**Supplementary Figure S2.** Detection of Cas9 expression on single clone of HP45 cell line stably expressing Cas9 by western blotting. Cell lysates of HP45-Cas9 along with HP45 were separated by SDS-PAGE, Western blotted, and probed with anti-Flag antibody, with  $\alpha$ -tubulin as the loading control.
